# Supplementary material for: Effect of EGFR on SQSTM1 Expression in Malignancy and Tumor Progression of Oral Squamous Cell Carcinoma
Source: MDPI journal article supplement (doi:10.3390/ijms222212226), 2021-11-12
Supplement: s1 [file s1]

## Supplementary materials

**A**

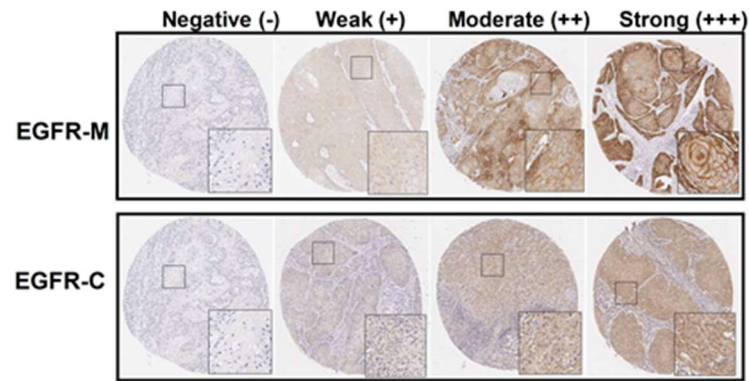

**B**

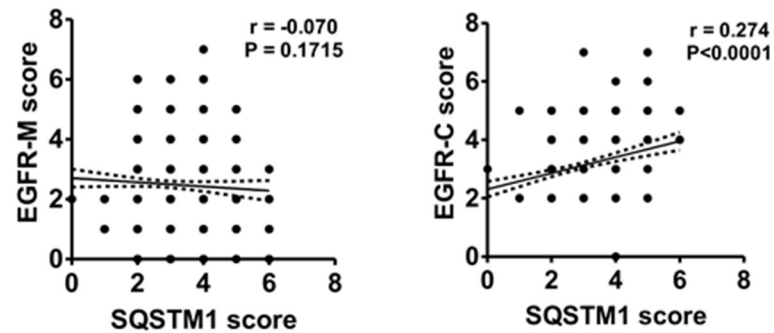

**Figure S1.** Expressions of EGFR-M and EGFR-C and their correlation with SQSTM1 in tumor tissues of OSCC patients. **(A)** Representative IHC images showing intensity scores of EGFR-M and EGFR-C staining as negative (-), weak (+), moderate (++), and strong (+++). **(B)** The correlation of EGFR-M and EGFR-C with SQSTM1 by the Pearson correlation analysis.

**Table S1.** The comparison of EGFR-M and EGFR-C expressions between corresponding tumor adjacent normal and normal tissues in OSCC patients.

| Variables                                                                                                                                                                                    | No. | Tumor adjacent normal |        | Tumor      |        | Z      | p-value* |
|----------------------------------------------------------------------------------------------------------------------------------------------------------------------------------------------|-----|-----------------------|--------|------------|--------|--------|----------|
|                                                                                                                                                                                              |     | Mean±SD               | Median | Mean±SD    | Median |        |          |
| OSCC                                                                                                                                                                                         |     |                       |        |            |        |        |          |
| EGFR-M                                                                                                                                                                                       | 348 | 1.48± 1.22            | 2.00   | 2.62± 1.16 | 3.00   | 10.542 | <0.001   |
| EGFR-C                                                                                                                                                                                       | 348 | 2.51± 0.86            | 2.00   | 3.08± 1.10 | 3.00   | 8.296  | <0.001   |
| BMSCC                                                                                                                                                                                        |     |                       |        |            |        |        |          |
| EGFR-M                                                                                                                                                                                       | 144 | 1.55± 1.27            | 2.00   | 2.54± 1.06 | 2.00   | 6.547  | <0.001   |
| EGFR-C                                                                                                                                                                                       | 144 | 2.54± 0.95            | 2.00   | 3.06± 1.07 | 3.00   | 4.994  | <0.001   |
| TSCC                                                                                                                                                                                         |     |                       |        |            |        |        |          |
| EGFR-M                                                                                                                                                                                       | 204 | 1.44± 1.17            | 2.00   | 2.68± 1.22 | 3.00   | 8.235  | <0.001   |
| EGFR-C                                                                                                                                                                                       | 204 | 2.49± 0.80            | 2.00   | 3.09± 1.12 | 3.00   | 6.618  | <0.001   |
| Abbreviations: OSCC, oral squamous cell carcinoma; BMSCC, buccal mucosa squamous cell carcinoma; TSCC, tongue squamous cell carcinoma; SD, standard deviation.; M, membrane; C, cytoplasmic. |     |                       |        |            |        |        |          |
| *p-valueswere estimated by Wilcoxon signed-rank test.                                                                                                                                        |     |                       |        |            |        |        |          |

**Table S2.** The association of EGFR-M expression with clinicopathologic outcomes in OSCC patients.

| Variable                                                                                                                                                                         | BMSCC (n=181) |             |        |         | TSCC (n=244) |             |        |         | OSCC (n=425) |             |        |         |
|----------------------------------------------------------------------------------------------------------------------------------------------------------------------------------|---------------|-------------|--------|---------|--------------|-------------|--------|---------|--------------|-------------|--------|---------|
|                                                                                                                                                                                  | %             | Mean±SD     | Median | p-value | %            | Mean±SD     | Median | p-value | %            | Mean±SD     | Median | p-value |
| Sex                                                                                                                                                                              |               |             |        |         |              |             |        |         |              |             |        |         |
| Female                                                                                                                                                                           | 2.2           | 1.50 ± 0.58 | 1.50   | 0.079*  | 11.9         | 2.34 ± 1.29 | 3.00   | 0.278*  | 7.8          | 2.24 ± 1.25 | 2.00   | 0.162*  |
| Male                                                                                                                                                                             | 97.8          | 2.45 ± 1.07 | 2.00   |         | 88.1         | 2.61 ± 1.22 | 2.00   |         | 92.2         | 2.54 ± 1.16 | 2.00   |         |
| Age, y                                                                                                                                                                           |               |             |        |         |              |             |        |         |              |             |        |         |
| ≤ 50                                                                                                                                                                             | 44.2          | 2.50 ± 1.09 | 2.00   | 0.442*  | 51.6         | 2.52 ± 1.20 | 2.00   | 0.479*  | 48.5         | 2.51 ± 1.15 | 2.00   | 0.990*  |
| > 50                                                                                                                                                                             | 55.8          | 2.38 ± 1.06 | 2.00   |         | 48.4         | 2.64 ± 1.27 | 3.00   |         | 51.5         | 2.52 ± 1.18 | 2.00   |         |
| Cell differentiation                                                                                                                                                             |               |             |        |         |              |             |        |         |              |             |        |         |
| Well                                                                                                                                                                             | 26.0          | 2.60 ± 1.06 | 2.00   | 0.176†  | 10.7         | 2.85 ± 1.08 | 3.00   | 0.164†  | 17.2         | 2.68 ± 1.07 | 3.00   | 0.052†  |
| Moderate                                                                                                                                                                         | 69.1          | 2.41 ± 1.05 | 2.00   |         | 82.4         | 2.58 ± 1.23 | 3.00   |         | 76.7         | 2.52 ± 1.16 | 2.00   |         |
| Poor                                                                                                                                                                             | 5.0           | 1.89 ± 1.36 | 2.00   |         | 7.0          | 2.12 ± 1.41 | 2.00   |         | 6.1          | 2.04 ± 1.37 | 2.00   |         |
| AJCC pathological stage                                                                                                                                                          |               |             |        |         |              |             |        |         |              |             |        |         |
| I, II                                                                                                                                                                            | 61.3          | 2.51 ± 0.96 | 2.00   | 0.192*  | 68.9         | 2.65 ± 1.27 | 3.00   | 0.181*  | 65.6         | 2.60 ± 1.16 | 3.00   | 0.051*  |
| III, IV                                                                                                                                                                          | 38.7          | 2.30 ± 1.22 | 2.00   |         | 31.1         | 2.42 ± 1.12 | 2.00   |         | 34.4         | 2.36 ± 1.17 | 2.00   |         |
| T classification                                                                                                                                                                 |               |             |        |         |              |             |        |         |              |             |        |         |
| T1, T2                                                                                                                                                                           | 75.7          | 2.47 ± 1.09 | 2.00   | 0.336*  | 79.5         | 2.59 ± 1.30 | 3.00   | 0.911‡  | 77.9         | 2.54 ± 1.21 | 2.00   | 0.398*  |
| T3, T4                                                                                                                                                                           | 24.3          | 2.30 ± 1.02 | 2.00   |         | 20.5         | 2.54 ± 0.93 | 2.00   |         | 22.1         | 2.43 ± 0.98 | 2.00   |         |
| N classification                                                                                                                                                                 |               |             |        |         |              |             |        |         |              |             |        |         |
| N0                                                                                                                                                                               | 75.1          | 2.53 ± 0.97 | 2.00   | 0.031*  | 79.9         | 2.63 ± 1.24 | 3.00   | 0.227*  | 77.9         | 2.54 ± 1.21 | 2.00   | 0.019*  |
| N1, N2                                                                                                                                                                           | 24.9          | 2.13 ± 1.31 | 2.00   |         | 20.1         | 2.39 ± 1.19 | 2.00   |         | 22.1         | 2.43 ± 0.98 | 2.00   |         |
| Abbreviations: OSCC, oral squamous cell carcinoma; BMSCC, buccal mucosa squamous cell carcinoma; TSCC, tongue squamous cell carcinoma; AJCC, American Joint Committee on Cancer. |               |             |        |         |              |             |        |         |              |             |        |         |
| *p values were estimated by student's t-test.                                                                                                                                    |               |             |        |         |              |             |        |         |              |             |        |         |
| †p values were estimated by one-way ANOVA test.                                                                                                                                  |               |             |        |         |              |             |        |         |              |             |        |         |
| ‡p values was estimated by Mann-Whitney U test.                                                                                                                                  |               |             |        |         |              |             |        |         |              |             |        |         |

**Table S3.** The association of EGFR-C expression with clinicopathologic outcomes in OSCC patients.

| Variable                                                                                                                                                                         | BMSCC (n=181) |             |        |         | TSCC (n=244) |             |        |         | OSCC (n=425) |             |        |         |
|----------------------------------------------------------------------------------------------------------------------------------------------------------------------------------|---------------|-------------|--------|---------|--------------|-------------|--------|---------|--------------|-------------|--------|---------|
|                                                                                                                                                                                  | %             | Mean±SD     | Median | p-value | %            | Mean±SD     | Median | p-value | %            | Mean±SD     | Median | p-value |
| Sex                                                                                                                                                                              |               |             |        |         |              |             |        |         |              |             |        |         |
| Female                                                                                                                                                                           | 2.2           | 2.50 ± 0.58 | 2.50   | 0.308*  | 11.9         | 3.03 ± 0.98 | 3.00   | 0.693*  | 7.8          | 2.97 ± 0.95 | 3.00   | 0.566*  |
| Male                                                                                                                                                                             | 97.8          | 3.03 ± 1.04 | 3.00   |         | 88.1         | 3.12 ± 1.12 | 3.00   |         | 92.2         | 3.08 ± 1.08 | 3.00   |         |
| Age, y                                                                                                                                                                           |               |             |        |         |              |             |        |         |              |             |        |         |
| ≤ 50                                                                                                                                                                             | 44.2          | 3.11 ± 1.04 | 3.00   | 0.296*  | 51.6         | 3.15 ± 1.09 | 3.00   | 0.558*  | 48.5         | 3.14 ± 1.07 | 3.00   | 0.241*  |
| > 50                                                                                                                                                                             | 55.8          | 2.95 ± 1.02 | 3.00   |         | 48.4         | 3.07 ± 1.12 | 3.00   |         | 51.5         | 3.01 ± 1.08 | 3.00   |         |
| Cell differentiation                                                                                                                                                             |               |             |        |         |              |             |        |         |              |             |        |         |
| Well                                                                                                                                                                             | 26.0          | 2.94 ± 0.87 | 3.00   | 0.745‡  | 10.7         | 3.00 ± 1.17 | 2.00   | 0.209‡  | 17.2         | 2.96 ± 0.98 | 3.00   | 0.162‡  |
| Moderate                                                                                                                                                                         | 69.1          | 3.02 ± 1.04 | 3.00   |         | 82.4         | 3.08 ± 1.06 | 3.00   |         | 76.7         | 3.06 ± 1.05 | 3.00   |         |
| Poor                                                                                                                                                                             | 5.0           | 3.44 ± 1.59 | 3.00   |         | 7.0          | 3.65 ± 1.41 | 4.00   |         | 6.1          | 3.58 ± 1.45 | 4.00   |         |
| AJCC pathological stage                                                                                                                                                          |               |             |        |         |              |             |        |         |              |             |        |         |
| I, II                                                                                                                                                                            | 61.3          | 2.94 ± 0.93 | 3.00   | 0.352†  | 68.9         | 2.93 ± 1.05 | 3.00   | <0.001* | 65.6         | 2.93 ± 1.00 | 3.00   | <0.001† |
| III, IV                                                                                                                                                                          | 38.7          | 3.16 ± 1.18 | 3.00   |         | 31.1         | 3.51 ± 1.11 | 4.00   |         | 34.4         | 3.34 ± 1.15 | 3.00   |         |
| T classification                                                                                                                                                                 |               |             |        |         |              |             |        |         |              |             |        |         |
| T1, T2                                                                                                                                                                           | 75.7          | 2.99 ± 1.02 | 3.00   | 0.400*  | 79.5         | 3.01 ± 1.10 | 3.00   | 0.003*  | 77.9         | 3.00 ± 1.07 | 3.00   | 0.006*  |
| T3, T4                                                                                                                                                                           | 24.3          | 3.14 ± 1.07 | 3.00   |         | 20.5         | 3.52 ± 1.01 | 4.00   |         | 22.1         | 3.34 ± 1.05 | 3.00   |         |
| N classification                                                                                                                                                                 |               |             |        |         |              |             |        |         |              |             |        |         |
| N0                                                                                                                                                                               | 75.1          | 2.95 ± 0.93 | 3.00   | 0.312†  | 79.9         | 3.02 ± 1.06 | 3.00   | 0.013†  | 77.9         | 2.99 ± 1.01 | 3.00   | 0.012†  |
| N1, N2                                                                                                                                                                           | 24.9          | 3.24 ± 1.28 | 3.00   |         | 20.1         | 3.49 ± 1.21 | 3.00   |         | 22.1         | 3.37 ± 1.24 | 3.00   |         |
| Abbreviations: OSCC, oral squamous cell carcinoma; BMSCC, buccal mucosa squamous cell carcinoma; TSCC, tongue squamous cell carcinoma; AJCC, American Joint Committee on Cancer. |               |             |        |         |              |             |        |         |              |             |        |         |
| *p values were estimated by student's t-test.                                                                                                                                    |               |             |        |         |              |             |        |         |              |             |        |         |
| † p values was estimated by Mann-Whitney U test.                                                                                                                                 |               |             |        |         |              |             |        |         |              |             |        |         |
| ‡ p values were estimated by Kruskal-Wallis one-way ANOVA test.                                                                                                                  |               |             |        |         |              |             |        |         |              |             |        |         |

**Table S4.** The co-expression of EGFR-M and SQSTM1 in disease-specific survival of OSCC patients.

| Variable                                                                                                                                                                                                                                                                 |            | No. (%)    | CHR (95% CI)     | <i>p</i> -value | AHR (95% CI)     | <i>p</i> -value * |
|--------------------------------------------------------------------------------------------------------------------------------------------------------------------------------------------------------------------------------------------------------------------------|------------|------------|------------------|-----------------|------------------|-------------------|
| <b>OSCC</b>                                                                                                                                                                                                                                                              |            |            |                  |                 |                  |                   |
| EGFR-M                                                                                                                                                                                                                                                                   | Low (0-3)  | 363 (84.6) | 1.00             |                 | 1.00             |                   |
|                                                                                                                                                                                                                                                                          | High (4-7) | 66 (15.4)  | 0.94 (0.61-1.43) | 0.763           | 1.12 (0.73-1.72) | 0.591             |
| SQSTM1                                                                                                                                                                                                                                                                   | Low (0-2)  | 239 (55.7) | 1.00             |                 | 1.00             |                   |
|                                                                                                                                                                                                                                                                          | High (3-7) | 190 (44.3) | 1.43 (1.07-1.93) | <b>0.017</b>    | 1.51 (1.12-2.04) | 0.006             |
| EGFR-M (L) SQSTM1 (L)                                                                                                                                                                                                                                                    |            | 200 (46.6) | 1                |                 | 1                |                   |
| either                                                                                                                                                                                                                                                                   |            | 202 (47.1) | 1.25 (0.92-1.68) | 0.143           | 1.30 (0.96-1.77) | 0.093             |
| EGFR-M (H) SQSTM1 (H)                                                                                                                                                                                                                                                    |            | 27 (6.3)   | 1.25 (0.70-2.24) | 0.460           | 1.43 (0.78-2.62) | 0.255             |
| <b>BMSCC</b>                                                                                                                                                                                                                                                             |            |            |                  |                 |                  |                   |
| EGFR-M                                                                                                                                                                                                                                                                   | Low (0-3)  | 157 (86.3) | 1.00             |                 | 1.00             |                   |
|                                                                                                                                                                                                                                                                          | High (4-7) | 25 (13.7)  | 0.85 (0.42-1.70) | 0.642           | 0.95 (0.47-1.93) | 0.894             |
| SQSTM1                                                                                                                                                                                                                                                                   | Low (0-3)  | 96 (52.7)  | 1.00             |                 | 1.00             |                   |
|                                                                                                                                                                                                                                                                          | High (4-7) | 86 (47.3)  | 1.72 (1.09-2.71) | 0.021           | 1.85 (1.16-2.94) | 0.010             |
| EGFR-M (L) SQSTM1 (L)                                                                                                                                                                                                                                                    |            | 78 (42.9)  | 1                |                 | 1                |                   |
| either                                                                                                                                                                                                                                                                   |            | 97 (53.3)  | 1.81 (1.14-2.90) | 0.013           | 1.80 (1.11-2.90) | 0.017             |
| EGFR-M (H) SQSTM1 (H)                                                                                                                                                                                                                                                    |            | 7 (3.8)    | 0.63 (0.15-2.55) | 0.514           | 0.88 (0.21-3.70) | 0.858             |
| <b>TSCC</b>                                                                                                                                                                                                                                                              |            |            |                  |                 |                  |                   |
| EGFR-M                                                                                                                                                                                                                                                                   | Low (0-2)  | 125 (50.6) | 1.00             |                 | 1.00             |                   |
|                                                                                                                                                                                                                                                                          | High (3-7) | 122 (49.4) | 0.88 (0.59-1.30) | 0.517           | 1.11 (0.75-1.66) | 0.598             |
| SQSTM1                                                                                                                                                                                                                                                                   | Low (0-2)  | 143 (57.9) | 1.00             |                 | 1.00             |                   |
|                                                                                                                                                                                                                                                                          | High (3-7) | 104 (42.1) | 1.26 (0.85-1.87) | 0.252           | 1.34 (0.90-1.98) | 0.150             |
| EGFR-M (L) SQSTM1 (L)                                                                                                                                                                                                                                                    |            | 73 (29.6)  | 1                |                 | 1                |                   |
| either                                                                                                                                                                                                                                                                   |            | 122 (49.4) | 0.80 (0.54-1.18) | 0.257           | 0.84 (0.54-1.32) | 0.458             |
| EGFR-M (H) SQSTM1 (H)                                                                                                                                                                                                                                                    |            | 52 (21.1)  | 1.28 (0.80-2.03) | 0.305           | 1.15 (0.67-1.97) | 0.610             |
| Abbreviations: OSCC, oral squamous cell carcinoma; BMSCC, buccal mucosa squamous cell carcinoma; TSCC, tongue squamous cell carcinoma; CHR, crude hazard ratio; CI, confidence interval; AHR, adjusted hazard ratio; H, high expression; L, low expression; M, membrane. |            |            |                  |                 |                  |                   |
| * <i>p</i> -value were adjusted for cell differentiation (moderate+poor vs. well) and AJCC pathological stage (stage III+IV vs stage I+II) by multiple Cox's regression.                                                                                                 |            |            |                  |                 |                  |                   |

**Table S5.** The co-expression of EGFR-C and SQSTM1 in disease-specific survival of OSCC patients.

| Variable                                                                                                                                                                                                                                                                    |            | No. (%)    | CHR (95% CI)     | <i>p</i> -value | AHR (95% CI)     | <i>p</i> -value * |
|-----------------------------------------------------------------------------------------------------------------------------------------------------------------------------------------------------------------------------------------------------------------------------|------------|------------|------------------|-----------------|------------------|-------------------|
| <b>OSCC</b>                                                                                                                                                                                                                                                                 |            |            |                  |                 |                  |                   |
| EGFR-C                                                                                                                                                                                                                                                                      | Low (0-3)  | 285 (75.5) | 1.00             |                 | 1.00             |                   |
|                                                                                                                                                                                                                                                                             | High (4-7) | 144 (24.5) | 1.21 (0.89-1.64) | 0.230           | 1.06 (0.78-1.44) | 0.718             |
| SQSTM1                                                                                                                                                                                                                                                                      | Low (0-2)  | 239 (55.7) | 1.00             |                 | 1.00             |                   |
|                                                                                                                                                                                                                                                                             | High (3-7) | 190 (44.3) | 1.43 (1.07-1.93) | 0.017           | 1.51 (1.12-2.04) | 0.006             |
| EGFR-C (L) SQSTM1 (L)                                                                                                                                                                                                                                                       |            | 174 (40.6) | 1                |                 | 1                |                   |
| either                                                                                                                                                                                                                                                                      |            | 176 (41.0) | 1.21 (0.90-1.63) | 0.217           | 1.40 (1.00-1.95) | 0.051             |
| EGFR-C (H) SQSTM1 (H)                                                                                                                                                                                                                                                       |            | 79 (18.4)  | 1.32 (0.92-1.90) | 0.130           | 1.57 (1.05-2.36) | 0.030             |
| <b>BMSCC</b>                                                                                                                                                                                                                                                                |            |            |                  |                 |                  |                   |
| EGFR-C                                                                                                                                                                                                                                                                      | Low (0-3)  | 132 (72.5) | 1.00             |                 | 1.00             |                   |
|                                                                                                                                                                                                                                                                             | High (4-7) | 50 (27.5)  | 1.37 (0.84-2.21) | 0.204           | 1.19 (0.73-1.92) | 0.492             |
| SQSTM1                                                                                                                                                                                                                                                                      | Low (0-2)  | 96 (52.7)  | 1.00             |                 | 1.00             |                   |
|                                                                                                                                                                                                                                                                             | High (3-7) | 86 (47.3)  | 1.72 (1.09-2.71) | 0.021           | 1.85 (1.16-2.94) | 0.010             |
|                                                                                                                                                                                                                                                                             |            |            |                  |                 |                  |                   |
| EGFR-C (L) SQSTM1 (L)                                                                                                                                                                                                                                                       |            | 76 (41.8)  | 1                |                 | 1                |                   |
| either                                                                                                                                                                                                                                                                      |            | 76 (41.8)  | 1.15 (0.73-1.81) | 0.552           | 1.46 (0.87-2.46) | 0.152             |
| EGFR-C (H) SQSTM1 (H)                                                                                                                                                                                                                                                       |            | 30 (16.5)  | 1.74 (1.01-2.99) | 0.045           | 2.12 (1.15-3.94) | 0.017             |
| <b>TSCC</b>                                                                                                                                                                                                                                                                 |            |            |                  |                 |                  |                   |
| EGFR-C                                                                                                                                                                                                                                                                      | Low (0-2)  | 99 (40.1)  | 1.00             |                 | 1.00             |                   |
|                                                                                                                                                                                                                                                                             | High (3-7) | 148 (59.9) | 0.97 (0.65-1.44) | 0.880           | 0.72 (0.48-1.08) | 0.111             |
| SQSTM1                                                                                                                                                                                                                                                                      | Low (0-2)  | 143 (57.9) | 1.00             |                 | 1.00             |                   |
|                                                                                                                                                                                                                                                                             | High (3-7) | 104 (42.1) | 1.26 (0.85-1.87) | 0.252           | 1.34 (0.90-1.98) | 0.150             |
| EGFR-C (L) SQSTM1 (L)                                                                                                                                                                                                                                                       |            | 68 (27.5)  | 1                |                 | 1                |                   |
| either                                                                                                                                                                                                                                                                      |            | 106 (42.9) | 1.07 (0.72-1.58) | 0.754           | 1.16 (0.72-1.87) | 0.543             |
| EGFR-C (H) SQSTM1 (H)                                                                                                                                                                                                                                                       |            | 73 (29.6)  | 1.08 (0.71-1.66) | 0.713           | 1.19 (0.70-1.99) | 0.523             |
| Abbreviations: OSCC, oral squamous cell carcinoma; BMSCC, buccal mucosa squamous cell carcinoma; TSCC, tongue squamous cell carcinoma; CHR, crude hazard ratio; CI, confidence interval; AHR, adjusted hazard ratio; H, high expression; L, low expression; C, cytoplasmic. |            |            |                  |                 |                  |                   |
| * <i>p</i> -value were adjusted for cell differentiation (moderate+poor vs. well) and AJCC pathological stage (stage III+IV vs stage I+II) by multiple Cox's regression.                                                                                                    |            |            |                  |                 |                  |                   |

**Table S6.** The co-expression of EGFR-M and SQSTM1 in disease-free survival of OSCC patients.

| Variable                                                                                                                                                                                                                                                                 |            | No. (%)    | CHR (95% CI)     | <i>p</i> -value | AHR (95% CI)     | <i>p</i> -value * |
|--------------------------------------------------------------------------------------------------------------------------------------------------------------------------------------------------------------------------------------------------------------------------|------------|------------|------------------|-----------------|------------------|-------------------|
| <b>OSCC</b>                                                                                                                                                                                                                                                              |            |            |                  |                 |                  |                   |
| EGFR-M                                                                                                                                                                                                                                                                   | Low (0-3)  | 363 (84.6) | 1.00             |                 | 1.00             |                   |
|                                                                                                                                                                                                                                                                          | High (4-7) | 66 (15.4)  | 0.94 (0.63-1.42) | 0.776           | 1.05 (0.69-1.58) | 0.825             |
| SQSTM1                                                                                                                                                                                                                                                                   | Low (0-2)  | 239 (55.7) | 1.00             |                 | 1.00             |                   |
|                                                                                                                                                                                                                                                                          | High (3-7) | 190 (44.3) | 1.31 (0.98-1.76) | 0.070           | 1.27 (0.95-1.71) | 0.109             |
| EGFR-M (L) SQSTM1 (L)                                                                                                                                                                                                                                                    |            | 200 (46.6) | 1                |                 | 1                |                   |
| either                                                                                                                                                                                                                                                                   |            | 202 (47.1) | 1.28 (0.95-1.72) | 0.100           | 1.30 (0.96-1.76) | 0.093             |
| EGFR-M (H) SQSTM1 (H)                                                                                                                                                                                                                                                    |            | 27 (6.3)   | 0.98 (0.53-1.81) | 0.956           | 1.12 (0.60-2.12) | 0.717             |
| <b>BMSCC</b>                                                                                                                                                                                                                                                             |            |            |                  |                 |                  |                   |
| EGFR-M                                                                                                                                                                                                                                                                   | Low (0-3)  | 157 (86.3) | 1.00             |                 | 1.00             |                   |
|                                                                                                                                                                                                                                                                          | High (4-7) | 25 (13.7)  | 1.05 (0.57-1.94) | 0.880           | 1.19 (0.64-2.22) | 0.585             |
| SQSTM1                                                                                                                                                                                                                                                                   | Low (0-2)  | 96 (52.7)  | 1.00             |                 | 1.00             |                   |
|                                                                                                                                                                                                                                                                          | High (4-7) | 86 (47.3)  | 1.21 (0.78-1.88) | 0.392           | 1.16 (0.74-1.81) | 0.519             |
|                                                                                                                                                                                                                                                                          |            |            |                  |                 |                  |                   |
| EGFR-M (L) SQSTM1 (L)                                                                                                                                                                                                                                                    |            | 114 (62.6) | 1                |                 | 1                |                   |
| either                                                                                                                                                                                                                                                                   |            | 62 (34.1)  | 1.49 (0.95-2.34) | 0.079           | 1.44 (0.91-2.28) | 0.117             |
| EGFR-M (H) SQSTM1 (H)                                                                                                                                                                                                                                                    |            | 6 (3.3)    | 0.51 (0.13-2.09) | 0.353           | 0.63 (0.15-2.65) | 0.531             |
| <b>TSCC</b>                                                                                                                                                                                                                                                              |            |            |                  |                 |                  |                   |
| EGFR-M                                                                                                                                                                                                                                                                   | Low (0-2)  | 125 (50.6) | 1.00             |                 | 1.00             |                   |
|                                                                                                                                                                                                                                                                          | High (3-7) | 122 (49.4) | 0.87 (0.58-1.29) | 0.479           | 0.92 (0.62-1.37) | 0.680             |
| SQSTM1                                                                                                                                                                                                                                                                   | Low (0-2)  | 143 (57.9) | 1.00             |                 | 1.00             |                   |
|                                                                                                                                                                                                                                                                          | High (3-7) | 104 (42.1) | 1.38 (0.93-2.04) | 0.112           | 1.35 (0.91-2.00) | 0.138             |
| EGFR-M (L) SQSTM1 (L)                                                                                                                                                                                                                                                    |            | 73 (29.6)  | 1                |                 | 1                |                   |
| either                                                                                                                                                                                                                                                                   |            | 122 (49.4) | 0.62 (0.42-0.93) | 0.021           | 0.69 (0.43-1.09) | 0.112             |
| EGFR (H) SQSTM1 (H)                                                                                                                                                                                                                                                      |            | 52 (21.1)  | 1.57 (1.01-2.45) | 0.046           | 1.25 (0.75-2.09) | 0.389             |
| Abbreviations: OSCC, oral squamous cell carcinoma; BMSCC, buccal mucosa squamous cell carcinoma; TSCC, tongue squamous cell carcinoma; CHR, crude hazard ratio; CI, confidence interval; AHR, adjusted hazard ratio; H, high expression; L, low expression; M, membrane. |            |            |                  |                 |                  |                   |
| * <i>p</i> -value were adjusted for cell differentiation(moderate+poor vs. well) and AJCC pathological stage (stage III+IV vs stage I+II) by multiple Cox's regression.                                                                                                  |            |            |                  |                 |                  |                   |

**Table S7.** The co-expression of EGFR-C and SQSTM1 in disease-free survival of OSCC patients.

| Variable              |            | No. (%)    | CHR (95% CI)     | <i>p</i> -value | AHR (95% CI)     | <i>p</i> -value * |
|-----------------------|------------|------------|------------------|-----------------|------------------|-------------------|
| <b>OSCC</b>           |            |            |                  |                 |                  |                   |
| EGFR-C                | Low (0-3)  | 285 (75.5) | 1.00             |                 | 1.00             |                   |
|                       | High (4-7) | 144 (24.5) | 0.90 (0.65-1.23) | 0.509           | 0.87 (0.63-1.20) | 0.383             |
| SQSTM1                | Low (0-2)  | 239 (55.7) | 1.00             |                 | 1.00             |                   |
|                       | High (3-7) | 190 (44.3) | 1.31 (0.98-1.76) | 0.070           | 1.27 (0.95-1.71) | 0.109             |
| EGFR-C (L) SQSTM1 (L) |            | 174 (40.6) | 1                |                 | 1                |                   |
| either                |            | 176 (41.0) | 1.16 (0.86-1.56) | 0.330           | 1.20 (0.87-1.66) | 0.266             |
| EGFR-C (H) SQSTM1 (H) |            | 79 (18.4)  | 1.03 (0.70-1.51) | 0.887           | 1.13 (0.74-1.72) | 0.571             |
| <b>BMSCC</b>          |            |            |                  |                 |                  |                   |
| EGFR-C                | Low (0-3)  | 132 (72.5) | 1.00             |                 | 1.00             |                   |
|                       | High (4-7) | 50 (27.5)  | 0.68 (0.40-1.17) | 0.163           | 0.65 (0.38-1.12) | 0.122             |
| SQSTM1                | Low (0-2)  | 96 (52.7)  | 1.00             |                 | 1.00             |                   |
|                       | High (3-7) | 86 (47.3)  | 1.21 (0.78-1.88) | 0.392           | 1.16 (0.74-1.81) | 0.519             |
| EGFR-C (L) SQSTM1 (L) |            | 76 (41.8)  | 1                |                 | 1                |                   |
| either                |            | 76 (41.8)  | 0.95 (0.61-1.47) | 0.802           | 0.93 (0.58-1.49) | 0.754             |
| EGFR-C (H) SQSTM1 (H) |            | 30 (16.5)  | 0.97 (0.52-1.78) | 0.909           | 0.93 (0.48-1.79) | 0.826             |
| <b>TSCC</b>           |            |            |                  |                 |                  |                   |
| EGFR-C                | Low (0-2)  | 99 (40.1)  | 1.00             |                 | 1.00             |                   |
|                       | High (3-7) | 148 (59.9) | 0.98 (0.66-1.46) | 0.919           | 0.91 (0.60-1.37) | 0.638             |
| SQSTM1                | Low (0-2)  | 143 (57.9) | 1.00             |                 | 1.00             |                   |
|                       | High (3-7) | 104 (42.1) | 1.38 (0.93-2.04) | 0.112           | 1.35 (0.91-2.00) | 0.138             |
| EGFR-C (L) SQSTM1 (L) |            | 68 (27.5)  | 1                |                 | 1                |                   |
| either                |            | 106 (42.9) | 1.03 (0.69-1.53) | 0.900           | 1.17 (0.72-1.92) | 0.523             |
| EGFR-C (H) SQSTM1 (H) |            | 73 (29.6)  | 1.18 (0.77-1.80) | 0.458           | 1.30 (0.77-2.20) | 0.334             |

Abbreviations: OSCC, oral squamous cell carcinoma; BMSCC, buccal mucosa squamous cell carcinoma; TSCC, tongue squamous cell carcinoma; CHR, crude hazard ratio; CI, confidence interval; AHR, adjusted hazard ratio; H, high expression; L, low expression; C, cytoplasmic.

\**p*-value were adjusted for cell differentiation(moderate+poor vs. well) and AJCC pathological stage (stage III+IV vs stage I+II) by multiple Cox's regression.
